# Supplementary material for: Cancer Risk and Behavioral Factors, Comorbidities, and Functional Status in the US Elderly Population
Source: PubMed Central journal article supplement (PMC3197174; doi:10.5402/2011/415790), 2011-07-12
Supplement: 415790.f1.pdf [file 415790.f1.pdf]

**Table 1 of Electronic Supplemental Material.** List of all variables used and their outcomes in 1994 and 1999 surveys. Relative risks are given in Tables 2 of Electronic Supplementary Material and in Table 2 in the text.

| Variable |                                                                                                        | 1994                | 1999                |
|----------|--------------------------------------------------------------------------------------------------------|---------------------|---------------------|
| A        | DEMOGRAPHIC CHARACTERISTICS (Dem)                                                                      |                     |                     |
| A1       | Sex                                                                                                    | Male                | Male                |
| A2       | Race                                                                                                   | nonwhite            | nonwhite            |
| A3       | Marital status                                                                                         | not married (check) | not married (check) |
| A4       | Urban/Rural                                                                                            | city                | city                |
| B        | CONDITION LIST (CND):                                                                                  |                     |                     |
| B1       | Rheumatism or arthritis                                                                                | No                  | No                  |
| B2       | Paralysis                                                                                              | No                  | No                  |
| B3       | Other permanent numbness or stiffness (besides paralysis, rheumatism or arthritis)                     | No                  | No                  |
| B4       | Multiple sclerosis                                                                                     | No                  | No                  |
| B5       | Cerebral palsy                                                                                         | No                  | No                  |
| B6       | Epilepsy                                                                                               | No                  | No                  |
| B7       | Parkinson's disease                                                                                    | No                  | No                  |
| B8       | Glaucoma                                                                                               | No                  | No                  |
| B9       | Diabetes                                                                                               | No                  | No                  |
| B10      | Cancer                                                                                                 | No                  | No                  |
| B11      | Frequent Constipation                                                                                  | No                  | No                  |
| B12      | Frequent trouble sleeping                                                                              | No                  | No                  |
| B13      | Frequent severe headaches                                                                              | No                  | No                  |
| B14      | Obesity or he/she is overweight                                                                        | No                  | No                  |
| B15      | Arteriosclerosis or hardening of the arteries of the arteries                                          | No                  | No                  |
| B16      | Has he/she had any of the following in the last 12 months: A heart attack                              | No                  | No                  |
| B17      | Has he/she had any of the following in the last 12 months: Any other hear problem                      | No                  | No                  |
| B18      | Has he/she had any of the following in the last 12 months: Hypertension or high blood pressure         | No                  | No                  |
| B19      | Has he/she had any of the following in the last 12 months: A stroke                                    | No                  | No                  |
| B20      | Has he/she had any of the following in the last 12 months: Circulation trouble in his/her arms or legs | No                  | No                  |
| B21      | Has he/she had any of the following in the last 12 months: Pneumonia                                   | No                  | No                  |
| B22      | Has he/she had any of the following in the last 12 months: Bronchitis                                  | No                  | No                  |
| B23      | Has he/she had any of the following in the last 12 months: Flu                                         | No                  | No                  |
| B24      | Has he/she had any of the following in the last 12 months: Emphysema                                   | No                  | No                  |
| B25      | Has he/she had any of the following in the last 12 months: Asthma                                      | No                  | No                  |
| B26      | Has he/she had any of the following in the last 12 months: A broken hip                                | No                  | No                  |
| B27      | Has he/she had any of the following in the last 12 months: Other broken bones                          | No                  | No                  |
| C        | Disability: ADL/IADL (ADL)                                                                             |                     |                     |
| C1       | ADL eating                                                                                             | can't               | can't               |
| C2       | ADL getting in/out of bed                                                                              | can't               | can't               |
| C3       | ADL getting around inside                                                                              | can't               | can't               |
| C4       | ADL dressing                                                                                           | can't               | can't               |
| C5       | ADL bathing                                                                                            | can't               | can't               |
| C6       | ADL getting to bathroom/using toilet                                                                   | can't               | can't               |
| C7       | IADL doing heavy work                                                                                  | can't               | can't               |
| C8       | IADL doing light work                                                                                  | can't               | can't               |
| C9       | IADL doing laundry                                                                                     | can't               | can't               |
| C10      | IADL preparing meals                                                                                   | can't               | can't               |
| C11      | IADL shopping for groceries                                                                            | can't               | can't               |
| C12      | IADL getting around outside                                                                            | can't               | can't               |
| C13      | IADL going places outside of walking                                                                   | can't               | can't               |
| C14      | IADL managing money                                                                                    | can't               | can't               |
| C15      | IADL taking medicine                                                                                   | can't               | can't               |
| C16      | IADL making telephone calls                                                                            | can't               | can't               |
| C17      | ADL cannot eat at all                                                                                  | can't               | can't               |
| C18      | ADL cannot get out of bed at all                                                                       | can't               | can't               |

**Table 1 of Electronic Supplemental Material.** List of all variables used and their outcomes in 1994 and 1999 surveys. Relative risks are given in Tables 2 of Electronic Supplementary Material and in Table 2 in the text.

|     | Variable                                                                                                          | 1994                    | 1999                    |
|-----|-------------------------------------------------------------------------------------------------------------------|-------------------------|-------------------------|
| C19 | ADL cannot get around inside at all                                                                               | can't                   | can't                   |
| C20 | ADL cannot dress at all                                                                                           | can't                   | can't                   |
| C21 | ADL did not bath at all                                                                                           | can't                   | can't                   |
| C22 | ADL did not get to bathroom/using toilet at all                                                                   | can't                   | can't                   |
| D   | RANGE OF MOTION (RMI)                                                                                             |                         |                         |
| D1  | Is he/she missing any fingers, a hand, or an arm                                                                  |                         | No                      |
| D2  | Is he/she missing any toes, a foot, or a leg                                                                      | No                      | No                      |
| D3  | How difficult is it for him/her to: climb one flight of stairs                                                    | very difficult/can't do | very difficult/can't do |
| D4  | How difficult is it for him/her to: walk to the end of a room and back                                            | very difficult/can't do | very difficult/can't do |
| D5  | How difficult is it for him/her to: bend to put on socks or stockings                                             | very difficult/can't do | very difficult/can't do |
| D6  | How difficult is it for him/her to: lift a 10-pound package like a bag of groceries and hold it for a few minutes | very difficult/can't do | very difficult/can't do |
| D7  | How difficult is it for him/her to: reach above head                                                              | very difficult/can't do | very difficult/can't do |
| D8  | How difficult is it for him/her to: comb or brush hair                                                            | very difficult/can't do | very difficult/can't do |
| D9  | How difficult is it for him/her to: wash hair                                                                     | very difficult/can't do | very difficult/can't do |
| D10 | How difficult is it for him/her to: use fingers to grasp and handle small objects                                 | very difficult/can't do | very difficult/can't do |
| D11 | Does he/she usually see well enough to read ordinary newsprint, with or without glasses or contact lenses         | No                      | No                      |
| D12 | Which of these devices does he/she uses: glasses/contact lenses                                                   | use                     | use                     |
| D13 | Which of these devices does he/she uses: hearing aid                                                              | use                     | use                     |
| D14 | Which of these devices does he/she uses: artificial larynx                                                        | use                     | use                     |
| D15 | Which of these devices does he/she uses: other                                                                    | use                     | use                     |
| D16 | Which of these devices does he/she uses: none                                                                     | not used                | not used                |
| E   | ACTIVITY LIST (AL)                                                                                                |                         |                         |
| E1  | In the past 2 weeks did he/she do: walking for exercise                                                           | yes                     |                         |
| E2  | In the past 2 weeks did he/she do: jogging or running                                                             | yes                     |                         |
| E3  | In the past 2 weeks did he/she do: hiking                                                                         | yes                     |                         |
| E4  | In the past 2 weeks did he/she do: gardening or yard work                                                         | yes                     |                         |
| E5  | In the past 2 weeks did he/she do: aerobics or aerobic dancing                                                    | yes                     |                         |
| E6  | In the past 2 weeks did he/she do: other dancing                                                                  | yes                     |                         |
| E7  | In the past 2 weeks did he/she do: calisthenics or general exercise                                               | yes                     |                         |
| E8  | In the past 2 weeks did he/she do: golf                                                                           | yes                     |                         |
| E9  | In the past 2 weeks did he/she do: tennis                                                                         | yes                     |                         |
| E10 | In the past 2 weeks did he/she do: bowling                                                                        | yes                     |                         |
| E11 | In the past 2 weeks did he/she do: biking                                                                         | yes                     |                         |
| E12 | In the past 2 weeks did he/she do: swimming or water exercise                                                     | yes                     |                         |
| E13 | In the past 2 weeks did he/she do: yoga                                                                           | yes                     |                         |
| E14 | In the past 2 weeks did he/she do: weight lifting or training                                                     | yes                     |                         |
| E15 | In the past 2 weeks did he/she do: basketball                                                                     | yes                     |                         |
| E16 | In the past 2 weeks did he/she do: baseball or softball                                                           | yes                     |                         |
| E17 | In the past 2 weeks did he/she do: football                                                                       | yes                     |                         |
| E18 | In the past 2 weeks did he/she do: soccer                                                                         | yes                     |                         |
| E19 | In the past 2 weeks did he/she do: volleyball                                                                     | yes                     |                         |
| E20 | In the past 2 weeks did he/she do: handball, racquetball, or squash                                               | yes                     |                         |
| E21 | In the past 2 weeks did he/she do: skating                                                                        | yes                     |                         |
| E22 | In the past 2 weeks did he/she do: skiing                                                                         | yes                     |                         |
| E23 | In the past 2 weeks did he/she do: any other physically active hobbies                                            | yes                     |                         |
| E24 | In the past 2 weeks did he/she do: none                                                                           | not at all              |                         |
| E25 | Does he/she exercises or plays sports regularly                                                                   | No                      |                         |
| E26 | Would he/she say that he/she is physically more, less, or about as active as other persons your age               | Less active/same        |                         |
| E27 | On a usual day, how much time does he/she spend on vigorous activities                                            | More than 10 min        | More than 10 min        |
| E28 | On a usual day, how much time does he/she spend on moderate activities                                            | More than 10 min        | More than 10 min        |
| E29 | On a usual day, how much time does he/she spend on light activities                                               | More than 10 min        | More than 10 min        |

**Table 1 of Electronic Supplemental Material.** List of all variables used and their outcomes in 1994 and 1999 surveys. Relative risks are given in Tables 2 of Electronic Supplementary Material and in Table 2 in the text.

| Variable |                                                                                                                                                                                                          | 1994       | 1999       |
|----------|----------------------------------------------------------------------------------------------------------------------------------------------------------------------------------------------------------|------------|------------|
| F        | NUTRITION & SOCIAL ACTIVITIES (NSA)                                                                                                                                                                      |            |            |
| F1       | Does he/she regularly go to a senior center                                                                                                                                                              | No         | No         |
| F2       | Does he/she regularly go to an adult day care center                                                                                                                                                     | No         | No         |
| F3       | Does he/she receive any health services or therapy at the center                                                                                                                                         | No         | No         |
| F4       | Does this center provide him/her with transportation between the center and his/her home                                                                                                                 | No         | No         |
| F5       | Does he/she now regularly eat meals in a senior center or some other place with a special meal for older people                                                                                          | No         | No         |
| F6       | Does he/she usually take a vitamin and/or mineral supplement once a week or more<br>How often during the past three months he/she has consumed several foods by themselves or as a part of mixed dishes: | No         | No         |
| F7       | Lowfat milk?                                                                                                                                                                                             |            | often      |
| F8       | Whole milk?                                                                                                                                                                                              |            | often      |
| F9       | Other dairy products such as yogurt or cheese?                                                                                                                                                           |            | often      |
| F10      | Eggs?                                                                                                                                                                                                    |            | often      |
| F11      | Poultry such as chicken or turkey?                                                                                                                                                                       |            | often      |
| F12      | Beef, pork, or lamb?                                                                                                                                                                                     |            | often      |
| F13      | Processed meats such as frankfurters or luncheon meats?                                                                                                                                                  |            | often      |
| F14      | Fish or shellfish?                                                                                                                                                                                       |            | often      |
| F15      | Breads?                                                                                                                                                                                                  |            | often      |
| F16      | Rice and other grains such as barley or oats?                                                                                                                                                            |            | often      |
| F17      | Pasta such as spaghetti or noodles?                                                                                                                                                                      |            | often      |
| F18      | Pizza?                                                                                                                                                                                                   |            | often      |
| F19      | Potatoes?                                                                                                                                                                                                |            | often      |
| F20      | Fortified breakfast cereals?                                                                                                                                                                             |            | often      |
| F21      | Other breakfast cereals?                                                                                                                                                                                 |            | often      |
| F22      | Dried peas, beans, or other legumes?                                                                                                                                                                     |            | often      |
| F23      | Vegetables?                                                                                                                                                                                              |            | often      |
| F24      | Fruits and juices?                                                                                                                                                                                       |            | often      |
| F25      | Butter, margarine, mayonnaise, or salad dressing?                                                                                                                                                        |            | often      |
| F26      | Sweet baked goods such as cookies or sweet rolls?                                                                                                                                                        |            | often      |
| F27      | Candy?                                                                                                                                                                                                   |            | often      |
| F28      | Sugared soft drinks?                                                                                                                                                                                     |            | often      |
| F29      | Coffee or tea?                                                                                                                                                                                           |            | often      |
| F30      | Alcohol, including liquor, beer, and wine?                                                                                                                                                               |            | often      |
| G        | ALCOHOL CONSUMPTION & SMOKING (ACS)                                                                                                                                                                      |            |            |
| G1       | Does he/she currently drink any kind of alcoholic beverage, such as beer, wine, or liquor                                                                                                                | No         | No         |
| G2       | Does he/she currently smoke                                                                                                                                                                              | No         | No         |
| G3       | Combined Variabe: Intensity of alcohol consumption (at least 1 time a week)                                                                                                                              | yes        | yes        |
| G4       | Combined Variabe: Intensity of smoking (at least 1 pack per day)                                                                                                                                         | yes        | yes        |
| H        | OTHER FUNCTIONING (OFN)                                                                                                                                                                                  |            |            |
| H1       | Compared to other persons the same age, would he/she say that his/her health is...                                                                                                                       | fair/poor  | fair/poor  |
| H2       | How often does he/she avoid doing things because he/she does not have enough energy to do them                                                                                                           | rarely     | rarely     |
| H3       | Does he/she ever feel he/she needs the help of a doctor or counselor for a mental or emotional problem                                                                                                   | No         | No         |
| H4       | Was he/she ever hospitalized for a mental/emotional problem                                                                                                                                              | No         | No         |
| H5       | Was he/she hospitalized for a mental or emotional problem in the last 5 years                                                                                                                            | No         | No         |
| H6       | Has a doctor ever advised him/her either recently or a long time ago--to get treatment for a mental or emotional problem                                                                                 | No         | No         |
| H7       | Has a doctor told him/her that (listed above) in the past 5 years                                                                                                                                        | No         | No         |
| H8       | Does he/she lose your temper and throw, kick, slam, or destroy things...<br>In the past month did he/she at any time...                                                                                  | not at all | not at all |
| H9       | ...lose way and not find the way back                                                                                                                                                                    | no         | no         |

**Table 1 of Electronic Supplemental Material.** List of all variables used and their outcomes in 1994 and 1999 surveys. Relative risks are given in Tables 2 of Electronic Supplementary Material and in Table 2 in the text.

|     | Variable                                                                                                                                                          | 1994             | 1999             |
|-----|-------------------------------------------------------------------------------------------------------------------------------------------------------------------|------------------|------------------|
| H10 | ...take any money or anything else that didn't belong to ...without realizing it_                                                                                 | no               | no               |
| H11 | ...forget to do important things like eat, take medicine, or pay...bills                                                                                          | no               | no               |
| H12 | Does anyone phone or check on him/her regularly just to make sure he/she is all right                                                                             | no               | no               |
| H13 | Does he/she keep in touch with any relatives either by visiting or by phone                                                                                       | no               | no               |
| H14 | Does he/she keep in touch with any friends, including neighbors he/she considers as friends, either by visiting or by telephone                                   | no               | no               |
| H15 | Sometimes people feel that they have nobody to tell their troubles to. Would he/she say he/she feels this way                                                     | rarely           | rarely           |
| H16 | Does he/she have any pets                                                                                                                                         | no               | no               |
| H17 | During the past week, did he/she read a book, magazine, or newspaper                                                                                              | no               | no               |
| H18 | During the past week, did he/she work on a hobby, like painting, sewing, or arts and crafts                                                                       | no               | no               |
| H19 | During the past week, did he/she play games such as solitaire or work on puzzles                                                                                  | no               | no               |
| H20 | During the past week, did he/she listen to records, tapes, (or CDs--in 1994)                                                                                      | no               | no               |
| H21 | During the past month did he/she go to religious services                                                                                                         | no               | no               |
| H22 | During the past month did he/she attend a meeting of a civic, religious, professional, or recreational club or org.                                               | no               | no               |
| H23 | During last two weeks did not feel like doing the things he/she usually does                                                                                      | no               | no               |
| H24 | During last two weeks could not sleep like he/she usually does                                                                                                    | no               | no               |
| H25 | During last two weeks lost his/her appetite / could not eat like he/she usually does                                                                              | no               | no               |
| H26 | Taken all together, how would he/she say things are these days...                                                                                                 | not too happy    | not too happy    |
| H27 | Generally speaking, how satisfied is he/she with his/her life as a whole...                                                                                       | not satisfied    | not satisfied    |
| H28 | About how many hours a day does he/she usually watch television                                                                                                   | more than 1 hour | more than 1 hour |
| I   | <b>HOUSING AND NEIGHBORHOOD CHARACTERISTICS (HNC)</b>                                                                                                             |                  |                  |
| I1  | All things considered, how satisfied is he/she with the place in which he/she is living...                                                                        | not satisfied    | not satisfied    |
| I2  | Is this place part of a building or community intended for older or retired, or disabled persons<br>Which of these things does he/she have in...(house/apartment) | no               | no               |
| I3  | ... extra handrails or grab bars                                                                                                                                  | has              | has              |
| I4  | ... ramps                                                                                                                                                         | has              | has              |
| I5  | ... elevators or stair lifts                                                                                                                                      | has              | has              |
| I6  | ... extra wide doors or hallways                                                                                                                                  | has              | has              |
| I7  | ... push bars on doors                                                                                                                                            | has              | has              |
| I8  | ... raised toilet                                                                                                                                                 | has              | has              |
| I9  | ... none<br>Which of these things would make things easier or more comfortable for him/her                                                                        | none             | none             |
| I10 | ... extra handrails or grab bars                                                                                                                                  | has              | has              |
| I11 | ... ramps                                                                                                                                                         | has              | has              |
| I12 | ... elevators or stair lifts                                                                                                                                      | has              | has              |
| I13 | ... extra wide doors or hallways                                                                                                                                  | has              | has              |
| I14 | ... push bars on doors                                                                                                                                            | has              | has              |
| I15 | ... raised toilet                                                                                                                                                 | has              | has              |
| I16 | ... none                                                                                                                                                          | none             | none             |
| I17 | Is there a toilet or portable toilet conveniently located in the room in which he/she sleeps                                                                      | no               | no               |
| I18 | Is there a toilet or portable toilet conveniently located in the room in which he/she spends most of his/her day                                                  | no               | no               |
| I19 | All things considered, how satisfied is he/she with this neighborhood...                                                                                          | not satisfied    | not satisfied    |
| I20 | Is there a conveniently located food or grocery store in the neighborhood                                                                                         | no               | no               |
| I21 | Is there a conveniently located drug store in the neighborhood                                                                                                    | no               | no               |
| I22 | Is crime a serious problem in this neighborhood                                                                                                                   | no               | no               |
| I23 | During the past year, has he/she (or any members of his/her household) been a victim of a crime in this neighborhood                                              | no               | no               |
| J   | <b>HEALTH INSURANCE (INS)</b>                                                                                                                                     |                  |                  |
| J1  | Is he/she now covered by Medicare                                                                                                                                 | no               | no               |
| J2  | During the past 12 months, has he/she received health care which has been or will be paid for by Medicaid                                                         | no               | no               |

**Table 1 of Electronic Supplemental Material.** List of all variables used and their outcomes in 1994 and 1999 surveys. Relative risks are given in Tables 2 of Electronic Supplementary Material and in Table 2 in the text.

|     | Variable                                                                                                                                                               | 1994   | 1999   |
|-----|------------------------------------------------------------------------------------------------------------------------------------------------------------------------|--------|--------|
| J3  | Does he/she now have a Medicaid card                                                                                                                                   | no     | no     |
| J4  | Is he/she now covered by any other public assistance program that pays for health care                                                                                 | no     | no     |
| J5  | Is he/she now covered by Champus or Champva...                                                                                                                         | no     | no     |
| J6  | Is he/she now covered by a private health insurance plan which pays any part of a hospital, doctor's, or surgeon's bill                                                | no     | no     |
| K   | MEDICAL PROVIDERS AND PRESCRIPTION MEDICINES (MPP)                                                                                                                     |        |        |
| K1  | Has he/she ever been a patient in a nursing home, convalescent or rest home                                                                                            | no     | no     |
| K2  | Is he/she now on a waiting list to go into a nursing home                                                                                                              | no     | no     |
| K3  | Has he/she been a patient in a hospital overnight or longer, in the last 12 months                                                                                     | no     | no     |
| K4  | In the last month...did he/she see a physical therapist, an occupational therapist, or a speech, or a hearing therapist (not counting when he/she was in the hospital) | no     | no     |
| K5  | Who will end up paying: fee for service insurance plans                                                                                                                | marked | marked |
| K6  | Who will end up paying: HMO/prepaid group                                                                                                                              | marked | marked |
| K7  | Who will end up paying: Medicare                                                                                                                                       | marked | marked |
| K8  | Who will end up paying: Medicaid                                                                                                                                       | marked | marked |
| K9  | Who will end up paying: Veterans Administration                                                                                                                        | marked | marked |
| K10 | Who will end up paying: Household Members                                                                                                                              | marked | marked |
| K11 | In the last month...did he/she discuss any personal problems with a psychiatrist, psychologist, or any other mental health professional                                | No     | No     |
| K12 | In the last month...did he/she receive care from a dentist, foot doctor, optometrist, or chiropractor                                                                  | No     | No     |
| K13 | ...did he/she receive care from a Dentist in last month                                                                                                                | marked | marked |
| K14 | ...did he/she receive care from a Foot doctor in last month                                                                                                            | marked | marked |
| K15 | ...did he/she receive care from a Optometrist in last month                                                                                                            | marked | marked |
| K16 | ...did he/she receive care from a Chiropractor in last month                                                                                                           | marked | marked |
| K17 | In the last month...did he/she go to an emergency room or hospital clinic when he/she did not stay overnight.                                                          | No     | No     |
| K18 | (Not counting any visits mentioned above)...did he/she receive medical care in a doctor's office                                                                       | No     | No     |
| K19 | In the last month...did he/she see a doctor in his/her home...                                                                                                         | No     | No     |
| K20 | Does he/she have a regular source of medical care, like a family doctor, a clinic, or some other medical person or place                                               | No     | No     |
| K21 | In the last month...did he/she receive nursing services at home from someone such as a visiting nurse, home health aide, or nurse's aide                               | No     | No     |
| K22 | In the last month, did he/she have any health problem or condition about which he/she would have liked to see a doctor or other medical person, but did not            | No     | No     |
|     | What is the reason that he/she did not see a doctor or other medical person:                                                                                           |        |        |
| K23 | ... financial                                                                                                                                                          | marked | marked |
| K24 | ... time                                                                                                                                                               | marked | marked |
| K25 | ... availability of a doctor                                                                                                                                           | marked | marked |
| K26 | ... transportation                                                                                                                                                     | marked | marked |
| K27 | ... not free to leave                                                                                                                                                  | marked | marked |
| K28 | ... problem not serious                                                                                                                                                | marked | marked |
| K29 | ... afraid to find out what's wrong                                                                                                                                    | marked | marked |
| K30 | ... weather                                                                                                                                                            | marked | marked |
| K31 | ... other                                                                                                                                                              | marked | marked |
| K32 | Will insurance, Medicare, Medicaid, or anyone else, including any members of his/her family, end up paying any of the charges for those visits                         | No     | No     |
| K33 | Who will end up paying: Fee for service insurance plans                                                                                                                | marked | marked |
| K34 | Who will end up paying: HMO/prepaid group                                                                                                                              | marked | marked |
| K35 | Who will end up paying: Medicare                                                                                                                                       | marked | marked |
| K36 | Who will end up paying: Medicaid                                                                                                                                       | marked | marked |
| K37 | Who will end up paying: Veterans Administration                                                                                                                        | marked | marked |
| K38 | Who will end up paying: Household Members                                                                                                                              | marked | marked |
| K39 | Who will end up paying: Children of sample person (non-household members)                                                                                              | marked | marked |
| K40 | Who will end up paying: other                                                                                                                                          | marked | marked |
| K41 | Who will end up paying: Public Program (non-Medicaid)                                                                                                                  | marked | marked |
| K42 | Who will end up paying: Private Charity                                                                                                                                | marked | marked |

**Table 1 of Electronic Supplemental Material.** List of all variables used and their outcomes in 1994 and 1999 surveys. Relative risks are given in Tables 2 of Electronic Supplementary Material and in Table 2 in the text.

|     | Variable                                                                                         | 1994                                                      | 1999                                                      |
|-----|--------------------------------------------------------------------------------------------------|-----------------------------------------------------------|-----------------------------------------------------------|
| K43 | Is he/she taking any prescription medicine to help calm him/her down or to relieve depression    | No                                                        | No                                                        |
| K44 | In the last month...how many prescription medicines were bought or obtained for him/her          | >2+ medicine                                              | >2+ medicine                                              |
| L   | COGNITIVE FUNCTIONING (CF)                                                                       |                                                           |                                                           |
| L1  | What is the date today                                                                           | not correct                                               | not correct                                               |
| L2  | What day of the week is this                                                                     | not correct                                               | not correct                                               |
| L3  | What is your street address                                                                      | not correct                                               | not correct                                               |
| L4  | In what state is this                                                                            | not correct                                               |                                                           |
| L5  | How old are you                                                                                  | not correct                                               |                                                           |
| L6  | When were you born                                                                               | not correct                                               |                                                           |
| L7  | Who is the President of the United States now                                                    | not correct                                               |                                                           |
| L8  | Who was the President just before him                                                            | not correct                                               |                                                           |
| L9  | What was your mother's maiden name                                                               | not correct                                               |                                                           |
| L10 | Subtract 3 from 20 and keep subtracting 3 from each new                                          | not correct                                               |                                                           |
| L11 | What is the name of this month?                                                                  |                                                           | not correct                                               |
| L12 | What year is it?                                                                                 |                                                           | not correct                                               |
| L13 | What time of the year is it?                                                                     |                                                           | not correct                                               |
| L14 | What is the name of this country?                                                                |                                                           | not correct                                               |
| L15 | What is the name of this city?                                                                   |                                                           | not correct                                               |
| L16 | What are the names of the two streets in the closest intersection?                               |                                                           | not correct                                               |
| L17 | What floor are we on now?                                                                        |                                                           | not correct                                               |
| L18 | Please repeat these three objects.                                                               |                                                           | all answers are correct                                   |
| M   | INCOME AND ASSETS (INC)                                                                          |                                                           |                                                           |
| M1  | Did he/she or any members of his/her family who live here receive food stamps in the last month  | no                                                        | no                                                        |
| M2  | Did he/she (or any member of his/her family who live here) receive any other welfare payments... | no                                                        | no                                                        |
| M3  | Which of these types of places is he/she living in now                                           | Alone/with others in house/apartment (independent living) | Alone/with others in house/apartment (independent living) |
| M4  | What are the living quarters?                                                                    | House, apartment of flat (vs room or mobile home)         | House, apartment of flat (vs room or mobile home)         |
| N   | Body Mass Index (BMI)                                                                            |                                                           |                                                           |
| N1  | Combined Variable: Body Mass Index: Low                                                          | lower than 18 kg/m**2                                     | lower than 18 kg/m**2                                     |
| N2  | Combined Variable: Body Mass Index: Normal                                                       | 18-25 kg/m**2                                             | 18-25 kg/m**2                                             |
| N3  | Combined Variable: Body Mass Index: High                                                         | higher than 25 kg/m**2                                    | higher than 25 kg/m**2                                    |
| N4  | On a typical day, how many meals Does he/she eat                                                 | >3 times                                                  | >3 times                                                  |
| N5  | Besides breakfast lunch and dinner how many other times during the day does he/she eat.          | >+1 times                                                 | >+1 times                                                 |
