# Supplementary material for: Cancer Risk and Behavioral Factors, Comorbidities, and Functional Status in the US Elderly Population
Source: PubMed Central journal article supplement (PMC3197174; doi:10.5402/2011/415790), 2011-07-12
Supplement: 415790.f2.pdf [file 415790.f2.pdf]

**Table 2 of Electronic Supplemental Material.** Relative risks (only significant estimates are shown) of incidental cancer for specific variables, four cancer sites, and two surveys (1994 and 1999). The values of relative risks correspond to outcomes in column 'outcome'. Three used methods are marked as AA (age-adjusted), CT (time follow-up in Cox model), and CA (age follow-up in Cox model).

| Variable                                                                                                                   | Outcome                                           | Cancer | RR94, AA    | RR94, CT    | RR94, CA    | RR99, AA    | RR99, CT     | RR99, CA     |
|----------------------------------------------------------------------------------------------------------------------------|---------------------------------------------------|--------|-------------|-------------|-------------|-------------|--------------|--------------|
| B10 Cancer                                                                                                                 | No                                                | Breast | <b>0.26</b> | <b>0.19</b> | <b>0.22</b> | <b>0.14</b> | <b>0.12</b>  | <b>0.09</b>  |
| B12 Frequent trouble sleeping                                                                                              | No                                                | Breast | .           | .           | .           | 0.47        | <b>0.22</b>  | 0.46         |
| B14 Obesity or he/she is overweight                                                                                        | No                                                | Breast | 0.58        | 0.48        | 0.58        | .           | .            | .            |
| B18 Has he/she had any of the following in the last 12 months: Hypertension or high blood pressure                         | No                                                | Breast | <b>0.34</b> | <b>0.43</b> | <b>0.33</b> | .           | .            | .            |
| D13 Which of these devices does he/she uses: hearing aid                                                                   | use                                               | Breast | 1.98        | .           | .           | <b>3.39</b> | .            | <b>4.52</b>  |
| F1 Does he/she regularly go to a senior center                                                                             | No                                                | Breast | .           | .           | .           | <b>0.13</b> | <b>0.16</b>  | <b>0.14</b>  |
| F6 Does he/she usually take a vitamin and/or mineral supplement once a week or more                                        | No                                                | Breast | .           | .           | .           | <b>0.16</b> | 0.31         | 0.17         |
| F14 Fish or shellfish?                                                                                                     | often                                             | Breast | .           | .           | .           | 2.5         | .            | 2.31         |
| F19 Potatoes?                                                                                                              | often                                             | Breast | .           | .           | .           | 0.42        | .            | 0.45         |
| F21 Other breakfast cereals?                                                                                               | often                                             | Breast | .           | .           | .           | 2.48        | .            | 2.36         |
| H12 Does anyone phone or check on him/her regularly just to make sure he/she is all right                                  | no                                                | Breast | 2.03        | 2           | 2.01        | .           | .            | .            |
| H17 During the past week, did he/she read a book, magazine, or newspaper                                                   | no                                                | Breast | <b>0.11</b> | 0.15        | .           | .           | .            | .            |
| H18 During the past week, did he/she work on a hobby, like painting, sewing, or arts and crafts                            | no                                                | Breast | 0.5         | <b>0.39</b> | 0.48        | .           | .            | .            |
| H19 During the past week, did he/she play games such as solitaire or work on puzzles                                       | no                                                | Breast | .           | .           | .           | 0.43        | .            | 0.43         |
| H20 During the past week, did he/she listen to records, tapes, (or CDs--in 1994)                                           | no                                                | Breast | .           | .           | .           | 0.35        | 0.5          | 0.39         |
| H21 During the past month did he/she go to religious services                                                              | no                                                | Breast | 1.92        | 1.99        | 1.99        | .           | .            | .            |
| H22 During the past month did he/she attend a meeting of a civic, religious, professional, or recreational club or org.    | no                                                | Breast | .           | .           | .           | 0.45        | .            | 0.47         |
| H25 During last two weeks lost his/her appetite / could not eat like he/she usually does                                   | no                                                | Breast | 0.38        | <b>0.29</b> | <b>0.3</b>  | .           | .            | .            |
| I2 Is this place part of a building or community intended for older or retired, or disabled persons                        | no                                                | Breast | .           | .           | .           | <b>0.28</b> | .            | <b>0.25</b>  |
| I4 ... ramps                                                                                                               | has                                               | Breast | .           | .           | .           | <b>5.72</b> | .            | <b>5.1</b>   |
| I5 ... elevators or stair lifts                                                                                            | has                                               | Breast | .           | .           | .           | <b>6.63</b> | .            | <b>6.64</b>  |
| I6 ... extra wide doors or hallways                                                                                        | has                                               | Breast | .           | .           | .           | 3.31        | 2.66         | <b>5.58</b>  |
| I8 ... raised toilet                                                                                                       | has                                               | Breast | .           | .           | .           | <b>5.66</b> | 3.15         | <b>6.42</b>  |
| I10 ... extra handrails or grab bars                                                                                       | has                                               | Breast | .           | .           | .           | <b>5.2</b>  | 3.2          | <b>5.87</b>  |
| I11 ... ramps                                                                                                              | has                                               | Breast | .           | .           | .           | <b>8.13</b> | <b>5.75</b>  | <b>16.19</b> |
| I12 ... elevators or stair lifts                                                                                           | has                                               | Breast | .           | .           | .           | <b>5.31</b> | <b>5.61</b>  | <b>16</b>    |
| I13 ... extra wide doors or hallways                                                                                       | has                                               | Breast | .           | .           | .           | <b>6.44</b> | 4.5          | <b>15.55</b> |
| I14 ... push bars on doors                                                                                                 | has                                               | Breast | .           | .           | .           | <b>7.07</b> | <b>14.12</b> | <b>30</b>    |
| I15 ... raised toilet                                                                                                      | has                                               | Breast | <b>3.55</b> | <b>5.4</b>  | <b>5.89</b> | <b>3.72</b> | <b>4.56</b>  | <b>8.92</b>  |
| I16 ... none                                                                                                               | none                                              | Breast | <b>0.41</b> | <b>0.33</b> | <b>0.38</b> | <b>0.33</b> | 0.45         | <b>0.25</b>  |
| J6 Is he/she now covered by a private health insurance plan which pays any part of a hospital, doctor's, or surgeon's bill | no                                                | Breast | <b>0.16</b> | 0.24        | 0.19        | .           | .            | .            |
| K3 Has he/she been a patient in a hospital overnight or longer, in the last 12 months                                      | no                                                | Breast | .           | .           | .           | <b>0.29</b> | <b>0.21</b>  | <b>0.23</b>  |
| K15 ...did he/she receive care from a Optometrist in last month                                                            | marked                                            | Breast | .           | .           | .           | 2.39        | <b>4.35</b>  | .            |
| K18 (Not counting any visits mentioned above)...did he/she receive medical care in a doctor's office                       | No                                                | Breast | 0.52        | 0.46        | 0.48        | .           | .            | .            |
| K38 Who will end up paying: Household Members                                                                              | marked                                            | Breast | 3.72        | 3.32        | <b>5.28</b> | <b>7.59</b> | .            | 5.07         |
| K39 Who will end up paying: Children of sample person (non-household members)                                              | marked                                            | Breast | .           | .           | .           | <b>7.55</b> | .            | 4.52         |
| K44 In the last month...how many prescription medicines were bought or obtained for him/her                                | >2+ medicine                                      | Breast | 1.9         | .           | 1.9         | .           | .            | .            |
| M4 What are the living quarters?                                                                                           | House, apartment of flat (vs room or mobile home) | Breast | 0.42        | <b>0.31</b> | 0.39        | .           | .            | .            |
| N2 Combined Variable: Body Mass Index: Normal                                                                              | 18-25 kg/m**2                                     | Breast | 0.56        | 0.55        | 0.52        | .           | .            | .            |
| N3 Combined Variable: Body Mass Index: High                                                                                | higher than 25 kg/m**2                            | Breast | 1.84        | 1.94        | 1.99        | .           | .            | .            |

**Table 2 of Electronic Supplemental Material.** Relative risks (only significant estimates are shown) of incidental cancer for specific variables, four cancer sites, and two surveys (1994 and 1999). The values of relative risks correspond to outcomes in column 'outcome'. Three used methods are marked as AA (age-adjusted), CT (time follow-up in Cox model), and CA (age follow-up in Cox model).

|     | Variable                                                                                                                                       | Outcome                 | Cancer   | RR94,<br>AA | RR94,<br>CT | RR94,<br>CA | RR99,<br>AA | RR99,<br>CT | RR99,<br>CA |
|-----|------------------------------------------------------------------------------------------------------------------------------------------------|-------------------------|----------|-------------|-------------|-------------|-------------|-------------|-------------|
| B1  | Rheumatism or arthritis                                                                                                                        | No                      | Prostate | .           | .           | .           | <b>2.41</b> | 2.21        | .           |
| B3  | Other permanent numbness or stiffness(besides paralysis rheumatism or arthritis)                                                               | No                      | Prostate | 2.24        | .           | .           | 2.61        | .           | .           |
| B8  | Glaucoma                                                                                                                                       | No                      | Prostate | 15.5        | .           | .           | 6.37        | .           | .           |
| B14 | Obesity or he/she is overweight                                                                                                                | No                      | Prostate | .           | .           | .           | 0.52        | .           | 0.45        |
| B20 | Has he/she had any of the following in the last 12 months:<br>Circulation trouble in his/her arms or legs                                      | No                      | Prostate | <b>7.05</b> | 3.65        | 4.85        | <b>3.36</b> | .           | .           |
| C2  | ADL getting in/out of bed                                                                                                                      | can't                   | Prostate | 0.27        | .           | .           | 0.26        | .           | .           |
| C4  | ADL dressing                                                                                                                                   | can't                   | Prostate | 0.09        | .           | .           | 0.16        | .           | .           |
| C5  | ADL bathing                                                                                                                                    | can't                   | Prostate | <b>0.23</b> | .           | .           | <b>0.16</b> | .           | .           |
| C6  | ADL getting to bathroom/using toilet                                                                                                           | can't                   | Prostate | 0.09        | .           | .           | <b>0.09</b> | .           | .           |
| C7  | IADL doing heavy work                                                                                                                          | can't                   | Prostate | 0.43        | .           | .           | 0.42        | .           | .           |
| C10 | IADL preparing meals                                                                                                                           | can't                   | Prostate | 0.17        | .           | .           | <b>0.1</b>  | .           | .           |
| C11 | IADL shopping for groceries                                                                                                                    | can't                   | Prostate | <b>0.17</b> | .           | .           | <b>0.23</b> | .           | .           |
| D3  | How difficult is it for him/her to: climb one flight of stairs                                                                                 | very difficult/can't do | Prostate | 0.34        | .           | .           | <b>0.08</b> | .           | .           |
| D5  | How difficult is it for him/her to: bend to put on socks or stockings                                                                          | very difficult/can't do | Prostate | 0.25        | .           | .           | 0.27        | .           | .           |
| D6  | How difficult is it for him/her to: lift a 10-pound package like a bag of groceries and hold it for a few minutes                              | very difficult/can't do | Prostate | 0.45        | .           | .           | 0.43        | .           | .           |
| D11 | Does he/she usually see well enough to read ordinary newsprint, with or without glasses or contact lenses                                      | No                      | Prostate | 0.14        | .           | .           | 1.92        | 2.29        | 2.2         |
| E26 | Would he/she say that he/she is physically more, less, or about as active as other persons your age                                            | Less active/same        | Prostate | 0.54        | .           | 0.56        | .           | .           | .           |
| E29 | On a usual day, how much time does he/she spend on light activities                                                                            | More than 10 min        | Prostate | 4.97        | .           | .           | 1.99        | .           | 1.85        |
| F6  | Does he/she usually take a vitamin and/or mineral supplement once a week or more                                                               | No                      | Prostate | .           | .           | .           | 0.51        | .           | 0.51        |
| F9  | Other dairy products such as yogurt or cheese?                                                                                                 | often                   | Prostate | .           | .           | .           | 0.52        | 0.52        | 0.53        |
| F10 | Eggs?                                                                                                                                          | often                   | Prostate | .           | .           | .           | 0.48        | 0.46        | <b>0.44</b> |
| F17 | Pasta such as spaghetti or noodles?                                                                                                            | often                   | Prostate | .           | .           | .           | <b>0.33</b> | 0.49        | <b>0.34</b> |
| F19 | Potatoes?                                                                                                                                      | often                   | Prostate | .           | .           | .           | 3.42        | .           | 3.84        |
| F21 | Other breakfast cereals?                                                                                                                       | often                   | Prostate | .           | .           | .           | 1.63        | 1.83        | 1.67        |
| G2  | Does he/she currently smoke                                                                                                                    | No                      | Prostate | 0.54        | 0.44        | 0.49        | .           | .           | .           |
| G3  | Combined Variable: Intensity of alcohol consumption (at least 1 time a week)                                                                   | yes                     | Prostate | <b>2.17</b> | 2.01        | 1.79        | .           | .           | .           |
| H1  | Compared to other persons the same age, would he/she say that his/her health is...                                                             | fair/poor               | Prostate | 0.45        | 0.48        | 0.42        | .           | .           | .           |
| H12 | Does anyone phone or check on him/her regularly just to make sure he/she is all right                                                          | no                      | Prostate | <b>3.21</b> | 2.44        | 3.34        | 2.05        | .           | .           |
| H17 | During the past week, did he/she read a book, magazine, or newspaper                                                                           | no                      | Prostate | 0.34        | .           | .           | <b>0.18</b> | .           | .           |
| H19 | During the past week, did he/she play games such as solitaire or work on puzzles                                                               | no                      | Prostate | .           | .           | .           | 2.33        | 2.87        | <b>3.12</b> |
| H22 | During the past month did he/she attend a meeting of a civic, religious, professional, or recreational club or org.                            | no                      | Prostate | .           | .           | .           | <b>0.43</b> | 0.58        | 0.52        |
| I16 | ... none                                                                                                                                       | none                    | Prostate | 2.74        | .           | .           | 2.35        | .           | .           |
| I20 | Is there a conveniently located drug store in the neighborhood                                                                                 | no                      | Prostate | .           | .           | .           | 0.42        | .           | 0.5         |
| K13 | ...did he/she receive care from a Dentist in last month                                                                                        | marked                  | Prostate | 0.18        | 0.27        | 0.18        | .           | .           | .           |
| K18 | (Not counting any visits mentioned above)...did he/she receive medical care in a doctor's office                                               | No                      | Prostate | 1.76        | .           | 1.77        | <b>4.52</b> | 2.62        | <b>4.02</b> |
| K32 | Will insurance, Medicare, Medicaid, or anyone else, including any members of his/her family, end up paying any of the charges for those visits | No                      | Prostate | .           | .           | .           | 2.26        | 2.03        | 2.31        |
| K44 | In the last month...how many prescription medicines were bought or obtained for him/her                                                        | >2+ medicine            | Prostate | 0.52        | 0.57        | 0.58        | <b>0.33</b> | 0.54        | 0.42        |
| L7  | Who was the President just before him                                                                                                          | not correct             | Prostate | 0.16        | 0.26        | 0.2         | .           | .           | .           |
| A1  | Sex                                                                                                                                            | Male                    | Lung     | <b>2.86</b> | 2.13        | <b>3.01</b> | 1.73        | .           | 1.8         |

**Table 2 of Electronic Supplemental Material.** Relative risks (only significant estimates are shown) of incidental cancer for specific variables, four cancer sites, and two surveys (1994 and 1999). The values of relative risks correspond to outcomes in column 'outcome'. Three used methods are marked as AA (age-adjusted), CT (time follow-up in Cox model), and CA (age follow-up in Cox model).

|     | Variable                                                                                                                 | Outcome                 | Cancer | RR94,<br>AA | RR94,<br>CT | RR94,<br>CA | RR99,<br>AA | RR99,<br>CT | RR99,<br>CA |
|-----|--------------------------------------------------------------------------------------------------------------------------|-------------------------|--------|-------------|-------------|-------------|-------------|-------------|-------------|
| A2  | Race                                                                                                                     | nonwhite                | Lung   | 2.14        | .           | 1.9         | .           | .           | .           |
| A4  | Urban/Rural                                                                                                              | city                    | Lung   | 1.71        | .           | 1.73        | .           | .           | .           |
| B24 | Has he/she had any of the following in the last 12 months: Emphysema                                                     | No                      | Lung   | .           | .           | .           | <b>0.34</b> | 0.32        | <b>0.27</b> |
| B27 | Has he/she had any of the following in the last 12 months: Other broken bones                                            | No                      | Lung   | <b>0.35</b> | .           | .           | <b>0.26</b> | .           | 0.37        |
| D7  | How difficult is it for him/her to: reach above head                                                                     | very difficult/can't do | Lung   | <b>2.6</b>  | .           | .           | <b>3.12</b> | .           | 2.58        |
| D10 | How difficult is it for him/her to: use fingers to grasp and handle small objects                                        | very difficult/can't do | Lung   | <b>4.53</b> | .           | 3.57        | .           | .           | .           |
| D11 | Which of these devices does he/she uses: glasses/contact lenses                                                          | use                     | Lung   | .           | .           | .           | 0.5         | .           | 0.43        |
| D16 | Which of these devices does he/she uses: none                                                                            | not used                | Lung   | .           | .           | .           | 2.19        | 2.29        | 2.73        |
| E1  | In the past 2 weeks did he/she do: walking for exercise                                                                  | yes                     | Lung   | 0.46        | .           | 0.42        | .           | .           | .           |
| E10 | In the past 2 weeks did he/she do: bowling                                                                               | yes                     | Lung   | 5.16        | <b>6.07</b> | <b>6.22</b> | .           | .           | .           |
| F1  | Does he/she regularly go to a senior center                                                                              | No                      | Lung   | <b>0.33</b> | 0.45        | 0.46        | .           | .           | .           |
| F9  | Other dairy products such as yogurt or cheese?                                                                           | often                   | Lung   | .           | .           | .           | 0.58        | 0.53        | .           |
| F11 | Poultry such as chicken or turkey?                                                                                       | often                   | Lung   | .           | .           | .           | <b>0.38</b> | .           | 0.44        |
| F16 | Rice and other grains such as barley or oats?                                                                            | often                   | Lung   | .           | .           | .           | 0.59        | .           | 0.58        |
| F19 | Potatoes?                                                                                                                | often                   | Lung   | .           | .           | .           | 21.3        | 7.94        | 17.12       |
| G1  | Does he/she currently smoke                                                                                              | No                      | Lung   | <b>0.21</b> | <b>0.24</b> | <b>0.2</b>  | 0.45        | 0.38        | <b>0.33</b> |
| G4  | Combined Variable: Intensity of smoking (at least 1 pack per day)                                                        | yes                     | Lung   | <b>7.39</b> | <b>5.77</b> | <b>6.51</b> | <b>7.04</b> | <b>7.19</b> | <b>8.3</b>  |
| H4  | Was he/she ever hospitalized for a mental/emotional problem                                                              | No                      | Lung   | 0.38        | 0.26        | .           | .           | .           | .           |
| H8  | Does he/she lose your temper and throw, kick, slam, or destroy things...                                                 | not at all              | Lung   | 0.42        | <b>0.3</b>  | 0.39        | .           | .           | .           |
| H11 | ...forget to do important things like eat, take medicine, or pay...bills                                                 | no                      | Lung   | .           | .           | .           | <b>0.3</b>  | 0.36        | <b>0.31</b> |
| H16 | Does he/she have any pets                                                                                                | no                      | Lung   | 2.63        | 2.66        | 2.96        | .           | .           | .           |
| H17 | During the past week, did he/she read a book, magazine, or newspaper                                                     | no                      | Lung   | <b>2.26</b> | 1.95        | 2.1         | 0.47        | .           | .           |
| H21 | During the past month did he/she go to religious services                                                                | no                      | Lung   | 1.76        | .           | 1.74        | .           | .           | .           |
| H23 | During last two weeks did not feel like doing the things he/she usually does                                             | no                      | Lung   | 0.47        | 0.45        | 0.38        | .           | .           | .           |
| H27 | Generally speaking, how satisfied is he/she with his/her life as a whole...                                              | not satisfied           | Lung   | <b>3.42</b> | .           | 3.36        | .           | .           | .           |
| I4  | ... ramps                                                                                                                | has                     | Lung   | 2.62        | .           | 2.92        | .           | .           | .           |
| I5  | ... elevators or stair lifts                                                                                             | has                     | Lung   | <b>5.48</b> | .           | <b>4.49</b> | .           | .           | .           |
| I18 | Is there a toilet or portable toilet conveniently located in the room in which he/she spends most of his/her day         | no                      | Lung   | 1.97        | 1.96        | 1.92        | .           | .           | .           |
| I20 | Is there a conveniently located food or grocery store in the neighborhood                                                | no                      | Lung   | .           | .           | .           | <b>2.57</b> | 2.2         | 2.28        |
| I21 | Is there a conveniently located drug store in the neighborhood                                                           | no                      | Lung   | .           | .           | .           | 1.76        | .           | 1.82        |
| I22 | Is crime a serious problem in this neighborhood                                                                          | no                      | Lung   | 0.49        | 0.43        | 0.39        | .           | .           | .           |
| J4  | Is he/she now covered by any other public assistance program that pays for health care                                   | no                      | Lung   | 0.26        | 0.16        | <b>0.12</b> | .           | .           | .           |
| J6  | Is he/she now covered by a private health insurance plan which pays any part of a hospital, doctor's, or surgeon's bill  | no                      | Lung   | .           | .           | .           | <b>3.11</b> | .           | <b>2.6</b>  |
| K12 | In the last month...did he/she receive care from a dentist, foot doctor, optometrist, or chiropractor                    | No                      | Lung   | 3.51        | .           | 3.5         | .           | .           | .           |
| K14 | ...did he/she receive care from a Foot doctor in last month                                                              | marked                  | Lung   | .           | .           | .           | <b>3.64</b> | 2.89        | <b>3.63</b> |
| K20 | Does he/she have a regular source of medical care, like a family doctor, a clinic, or some other medical person or place | No                      | Lung   | <b>3.42</b> | 2.71        | <b>3.22</b> | .           | .           | .           |
| K33 | Who will end up paying: Fee for service insurance plans                                                                  | marked                  | Lung   | 0.17        | 0.18        | 0.16        | 0.23        | 0.33        | 0.32        |
| K36 | Who will end up paying: Medicaid                                                                                         | marked                  | Lung   | <b>3.41</b> | .           | .           | 2.23        | .           | 2.91        |
| K37 | Who will end up paying: Veterans Administration                                                                          | marked                  | Lung   | <b>4.83</b> | .           | 3.63        | .           | .           | .           |

**Table 2 of Electronic Supplemental Material.** Relative risks (only significant estimates are shown) of incidental cancer for specific variables, four cancer sites, and two surveys (1994 and 1999). The values of relative risks correspond to outcomes in column 'outcome'. Three used methods are marked as AA (age-adjusted), CT (time follow-up in Cox model), and CA (age follow-up in Cox model).

|     | Variable                                                                                                                                                               | Outcome                                           | Cancer | RR94,<br>AA | RR94,<br>CT | RR94,<br>CA | RR99,<br>AA  | RR99,<br>CT | RR99,<br>CA |
|-----|------------------------------------------------------------------------------------------------------------------------------------------------------------------------|---------------------------------------------------|--------|-------------|-------------|-------------|--------------|-------------|-------------|
| M4  | What are the living quarters?                                                                                                                                          | House, apartment of flat (vs room or mobile home) | Lung   | .           | .           | .           | <b>0.35</b>  | .           | 0.35        |
| N2  | Combined Variable: Body Mass Index: Normal                                                                                                                             | 18-25 kg/m**2                                     | Lung   | .           | .           | .           | <b>3.33</b>  | 3.08        | <b>3.63</b> |
| N3  | Combined Variable: Body Mass Index: High                                                                                                                               | higher than 25 kg/m**2                            | Lung   | .           | .           | .           | 0.3          | 0.34        | <b>0.28</b> |
| N5  | Besides breakfast lunch and dinner how many other times during the day does he/she eat.                                                                                | >+1 times                                         | Lung   | 1.75        | .           | 1.91        | .            | .           | .           |
| A1  | Sex                                                                                                                                                                    | Male                                              | Colon  | .           | .           | .           | 2.47         | .           | 2.2         |
| A4  | Urban/Rural                                                                                                                                                            | city                                              | Colon  | .           | .           | .           | 0.39         | .           | 0.45        |
| B1  | Rheumatism or arthritis                                                                                                                                                | No                                                | Colon  | 1.75        | 1.86        | .           | 2.21         | .           | .           |
| B2  | Paralysis                                                                                                                                                              | No                                                | Colon  | <b>0.16</b> | 0.29        | 0.22        | <b>0.25</b>  | .           | .           |
| B16 | Has he/she had any of the following in the last 12 months: A heart attack                                                                                              | No                                                | Colon  | .           | .           | .           | <b>0.25</b>  | .           | 0.22        |
| B17 | Has he/she had any of the following in the last 12 months: Any other hear problem                                                                                      | No                                                | Colon  | .           | .           | .           | <b>0.34</b>  | .           | 0.3         |
| B21 | Has he/she had any of the following in the last 12 months: Pneumonia                                                                                                   | No                                                | Colon  | 0.36        | .           | 0.29        | .            | .           | .           |
| B22 | Has he/she had any of the following in the last 12 months: Bronchitis                                                                                                  | No                                                | Colon  | 0.52        | .           | 0.49        | .            | .           | .           |
| D15 | Which of these devices does he/she uses: other                                                                                                                         | use                                               | Colon  | <b>5.31</b> | .           | <b>4.37</b> | .            | .           | .           |
| E1  | In the past 2 weeks did he/she do: walking for exercise                                                                                                                | yes                                               | Colon  | <b>2.64</b> | 1.83        | 2.54        | .            | .           | .           |
| E27 | On a usual day, how much time does he/she spend on vigorous activities                                                                                                 | More than 10 min                                  | Colon  | 0.34        | 0.37        | 0.34        | .            | .           | .           |
| E29 | Coffee or tea?                                                                                                                                                         | often                                             | Colon  | .           | .           | .           | 0.42         | 0.39        | <b>0.27</b> |
| G1  | Does he/she currently drink any kind of alcoholic beverage, such as beer, wine, or liquor                                                                              | No                                                | Colon  | 3.87        | 2.44        | 3.95        | .            | .           | .           |
| H17 | During the past week, did he/she read a book, magazine, or newspaper                                                                                                   | no                                                | Colon  | 1.89        | .           | .           | <b>2.78</b>  | .           | .           |
| H21 | During the past month did he/she go to religious services                                                                                                              | no                                                | Colon  | 0.57        | 0.56        | .           | .            | .           | .           |
| I3  | ... extra handrails or grab bars                                                                                                                                       | has                                               | Colon  | <b>2.45</b> | 1.88        | 2.12        | .            | .           | .           |
| I9  | ... none                                                                                                                                                               | none                                              | Colon  | 0.49        | .           | 0.55        | .            | .           | .           |
| I13 | ... extra wide doors or hallways                                                                                                                                       | has                                               | Colon  | <b>3.91</b> | 3.51        | .           | .            | .           | .           |
| J4  | Is he/she now covered by any other public assistance program that pays for health care                                                                                 | no                                                | Colon  | .           | .           | .           | 0.25         | 0.24        | .           |
| K3  | Has he/she been a patient in a hospital overnight or longer, in the last 12 months                                                                                     | no                                                | Colon  | .           | .           | .           | 0.46         | <b>0.3</b>  | 0.38        |
| K4  | In the last month...did he/she see a physical therapist, an occupational therapist, or a speech, or a hearing therapist (not counting when he/she was in the hospital) | no                                                | Colon  | 0.35        | 0.4         | 0.34        | .            | .           | .           |
| K35 | Who will end up paying: Medicare                                                                                                                                       | marked                                            | Colon  | 3.4         | <b>4.21</b> | <b>5.03</b> | .            | .           | .           |
| K15 | ...did he/she receive care from a Optometrist in last month                                                                                                            | marked                                            | Colon  | .           | .           | .           | 3.04         | .           | 2.8         |
| K32 | Will insurance, Medicare, Medicaid, or anyone else, including any members of his/her family, end up paying any of the charges for those visits                         | No                                                | Colon  | 2.54        | 2.27        | 2.22        | .            | .           | .           |
| L15 | What is the name of this city?                                                                                                                                         | not correct                                       | Colon  | .           | .           | .           | <b>10.93</b> | .           | 18.73       |
